# Supplementary material
Source: PubMed Central journal article supplement (PMC6640325)
Supplement: MPP-11-203-s002.pdf [file MPP-11-203-s002.pdf]

Figure S1

A

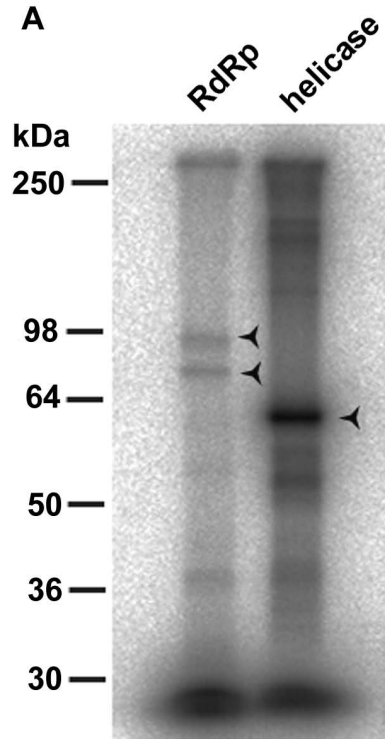

B

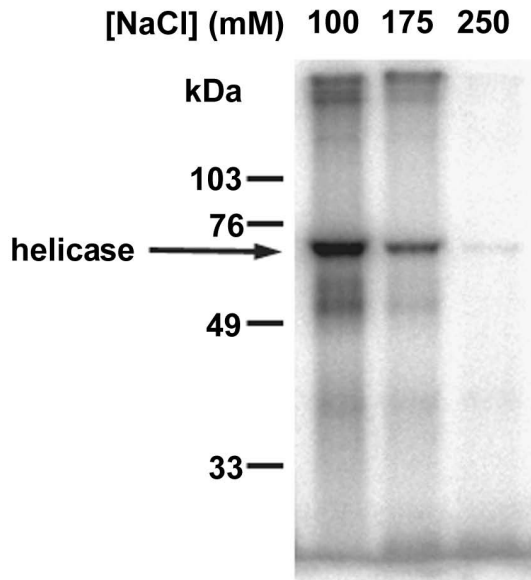

**Fig. S1** UV cross-linking assay of the purified proteins with Ba-77 RNA probe. (A)

The same amount of purified GST fused RdRp (indicated as RdRp) and helicase-like domain (indicated as helicase) shown above each lane was UV cross-linked with <sup>32</sup>P-labeled -77 RNA (190 fmole). After treatment with RNase A, the labeled proteins were resolved on a 12% SDS- polyacrylamide gel and analyzed using a phosphorimager. The arrows indicate the position of cross-linked proteins.

Besides the full-length GST-fusion RdRp protein, the degradation product of lower molecular weight was also linked. (B) The optimization for the UV cross-linking reaction with various salt concentrations indicated above each lane was examined.

The condition we have used in the rest of UV cross-linking experiment is using 175 mM NaCl which is shows less background.

**Table S1** The binding activity of the *E. coli*-expressed helicase-like domain of

BaMV replicase with Ba-77 probe and competitors.

| Competitor | polyIC   | polyA     | polyG     | polyU     | polyC    |
|------------|----------|-----------|-----------|-----------|----------|
| 0X         | 100      | 100       | 100       | 100       | 100      |
| 1X         | 27.2±4.9 | 83.2±6.2  | 75.4±17.8 | 64.6±21.9 | 93.9±3.6 |
| 5X         | 8.3±4.3  | 42.6±12.6 | 72.9±12.5 | 65.6±15.2 | 80.4±4.4 |
| 10X        | 2.6±3.6  | 28.0±6.1  | 60.2±13.2 | 50.3±9.5  | 78.7±8.1 |

| 100X       | 0.1±0.1   | 18.9±4.1  | 25.9±13.9 | 40.4±13.1  | 72.5±10.1 |
|------------|-----------|-----------|-----------|------------|-----------|
| Competitor | Ba-39     | Ba-77/△31 | Ba-77     | yeast tRNA |           |
| 0X         | 100       | 100       | 100       | 100        |           |
| 1X         | 98.5±11.2 | 79.3±14.5 | 85.5±12.4 | 72.5±12.8  |           |
| 5X         | 86.7±3.2  | 61.2±4.8  | 32.8±2.4  | 28.0±2.2   |           |
| 10X        | 74.2±6.3  | 47.2±2.8  | 16.6±8.6  | 8.3±0.9    |           |
| 100X       | 34.9±5.2  | 19.6±1.3  | 3.7±0.5   | 1.7±0.9    |           |
| Competitor | Ba-77     | Ba-77/LM  | Ba-77/LR  | Ba-77/UM   | Ba-77/UR  |
| 0X         | 100       | 100       | 100       | 100        | 100       |
| 1X         | 73.6±8.3  | 96.3±5.3  | 107.5±5.5 | 96.0±10.4  | 90.2±5.1  |
| 5X         | 40.8±3.4  | 81.0±10.1 | 96.1±4.7  | 59.9±3.9   | 52.4±8.6  |
| 10X        | 21.5±3.4  | 68.9±12.9 | 89.2±8.6  | 34.4±3.1   | 27.0±3.6  |
| 20X        | 12.6±4.9  | 61.9±6.5  | 81.9±4.6  | 14.6±3.9   | 12.7±3.2  |

The banding density of helicase-like domain of replicase crosslinked with Ba-77

probe without any competitor is set for 100.

All data are the average ( $\pm$ standard deviation) of at least three independent

experiments
